# Supplementary material
Source: PubMed Central journal article supplement (PMC3177315)

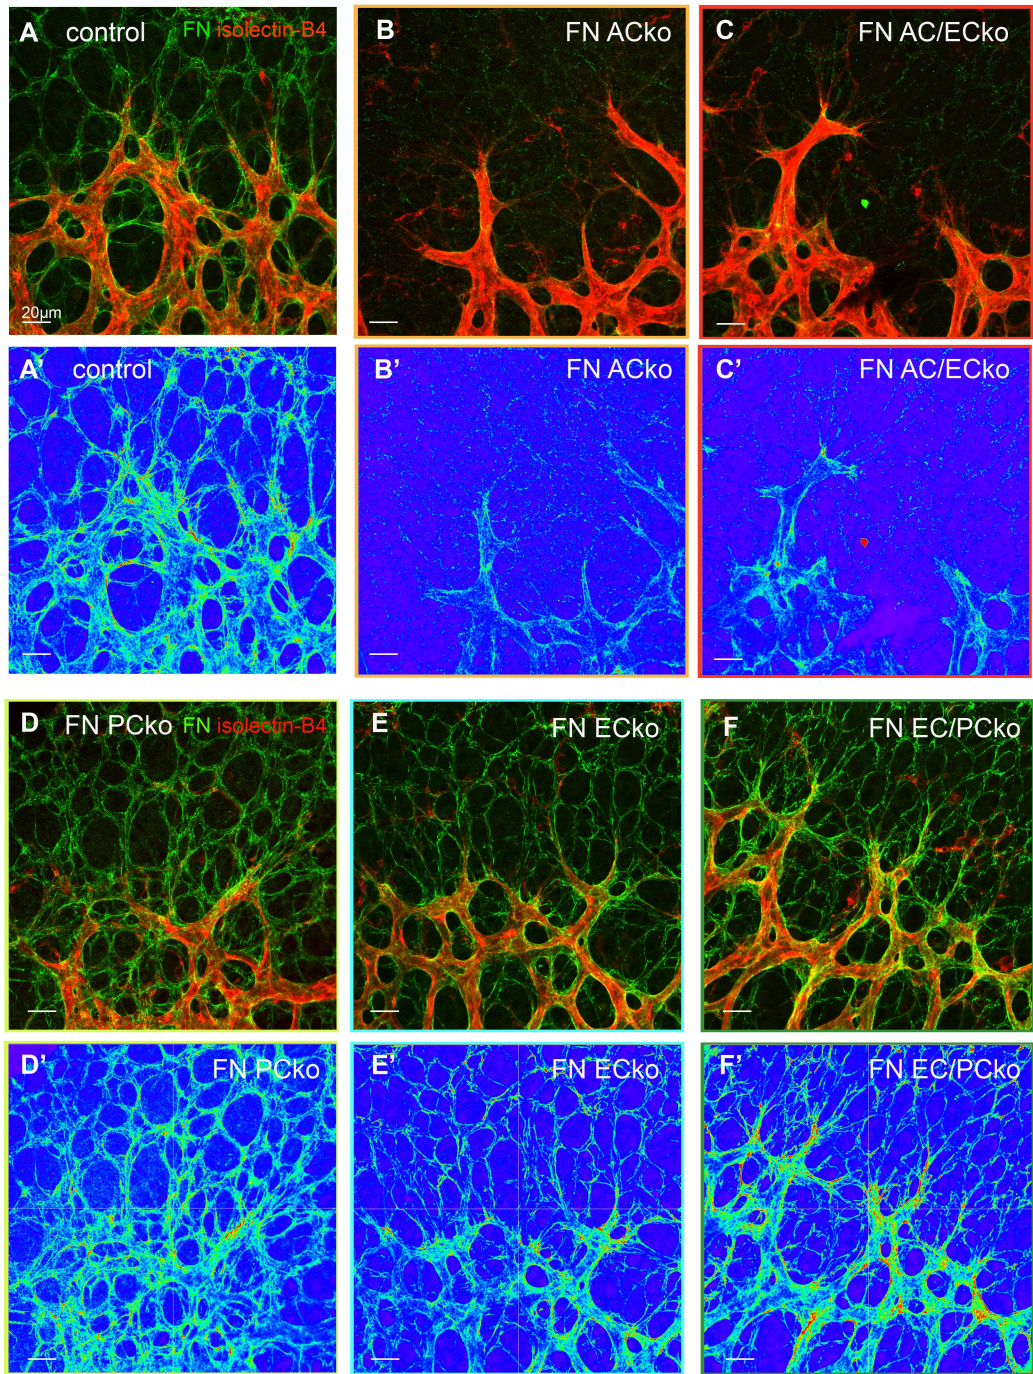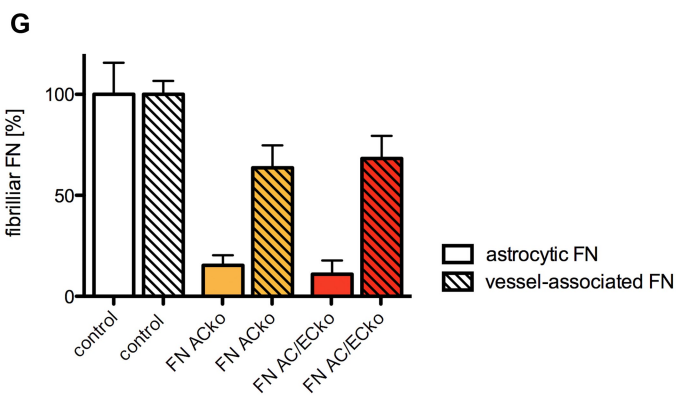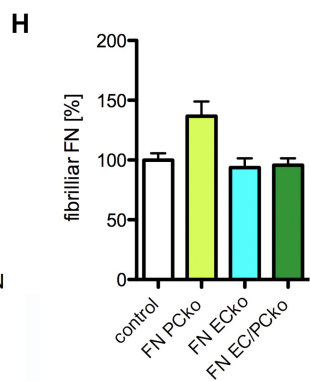

Supplement: supp_dev.071381_DEV071381FigS1.pdf [file supp_dev.071381_DEV071381FigS1.pdf]

Isolectin B4

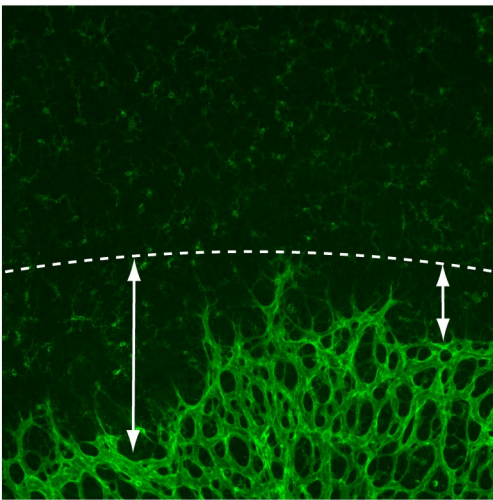

Fibronectin

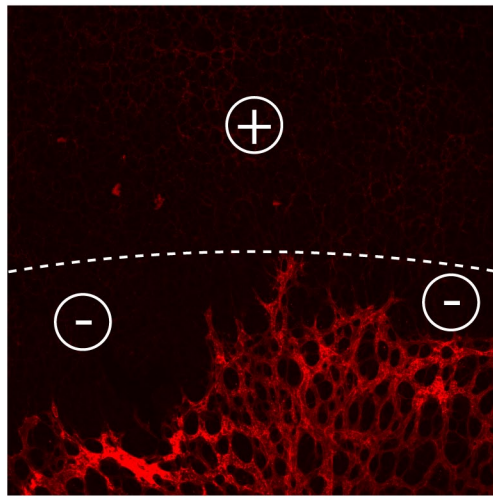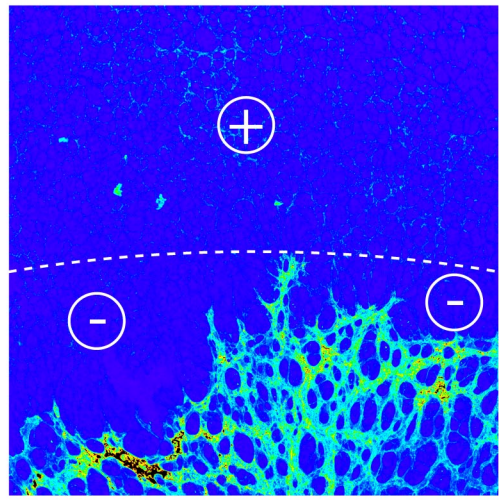

Supplement: supp_dev.071381_DEV071381FigS2.pdf [file supp_dev.071381_DEV071381FigS2.pdf]
